# Supplementary material
Source: HighWire-hosted journal article supplement (https://bmjopen.bmj.com/content/10/10/e036768)
Supplement: inline-supplementary-material-2 [file inline-supplementary-material-2.pdf]

**Supplemental Table 2. Days in care and days of visits for temporomandibular joint disorder patients in Korea**

| Total 10,041 Patients |              | Mean*     | Min | Median | Max |
|-----------------------|--------------|-----------|-----|--------|-----|
| Days in care          | Total        | 2.4 (3.7) | 1   | 1      | 108 |
|                       | K076 (9,527) | 2.4 (3.7) | 1   | 1      | 108 |
|                       | S034(576)    | 2.1 (3.5) | 1   | 1      | 50  |
| Days of Visits        | Total        | 2.4 (3.6) | 1   | 1      | 108 |
|                       | K076 (9,527) | 2.4 (3.7) | 1   | 1      | 108 |
|                       | S034(576)    | 2.1 (3.5) | 1   | 1      | 50  |

\*Standard deviation in parenthesis

Min, minimum; Max, maximum
